# Supplementary material for: Bulk-Cusp Microstructure for Controllable Multi-Directional Fluid Spreading
Source: Research Square preprint supplement (doi:10.21203/rs.3.rs-6668463/v1), 2025-05-28
Supplement: Supplementary file 1 [file e8c5f7bc8110d2f9ef441430.docx]

Supporting Information

Bulk-Cusp Microstructure for Controllable Multi-Directional Fluid Spreading

Songjie Dai 1, Hui Zhang 1, *, Yang Liu 1, Fenghao Yi 1, Kaibin Shi 1, Guangneng Dong 1

*1 Key Laboratory of Education Ministry for Modern Design & Rotor-Bearing System, Xi’an Jiaotong University, Xi’an 710049, China*

*Corresponding author’s E-mail: zhanghui7@xjtu.edu.cn*

**The PDF file includes:**

- Supplementary Text
- Figures S1 to S12

**Other Supporting information for this manuscript includes the following:**

- Movies S1 to S6

**Supplementary Text**

**Design Strategy of the Bulk-Cusp Microstructure**

The cross-cusp and square-cusp microstructures are designed to regulate the self-driven transport of the droplet body and precursor film, respectively, by precisely tailoring the orientation of the cusp structures. Each microstructure consists of a central bulk and directionally arranged cusps, which collectively dictate fluid spreading behavior. As shown in **Figure S3(a)** and **Figure S5(a)**, the microstructure bulk takes the form of either a cross or a square, with cusps systematically positioned along its four edges. The orientation of each cusp determines the spreading direction of the fluid. The cusp orientations are defined as left-forward (L-f), right-forward (R-f), left-backward (L-b), right-backward (R-b), front-left (F-l), front-right (F-r), back-left (B-l), and back-right (B-r). These directional elements govern the subsequent assembly of array units, giving rise to distinct fluid spreading behaviors.

As depicted in **Figure S3(b)** and **Figure S5(b)**, four individual microstructures (Individual I–IV) are constructed by varying the cusp orientations. Each unit exhibits a unique cusp arrangement, influencing fluid spreading in a predefined manner. Specifically, cusps positioned on the left and right sides dictate forward and backward spreading, whereas cusps located on the top and bottom modulate lateral transport. These fundamental structures serve as the building blocks for assembling higher-order arrays that enable controllable multidirectional fluid spreading. **Figure S3(c)** and **Figure S5(c)** illustrate the transition from individual units to five distinct microstructure array patterns. In the cross-cusp microstructure, spatial arrangement governs the transport of the droplet body. The C-pinning mode confines the droplet at its initial position, preventing spreading. C-mode I introduces a unidirectional transport pathway, while C-mode II, C-mode III, and C-mode IV enable progressively more complex transport modes, facilitating bidirectional, three-directional, and four-directional spreading. Similarly, in the square-cusp microstructure, different array configurations dictate precursor film transport, where the S-pinning mode immobilizes the film, and S-mode I–IV progressively enable controlled spreading across one to four directions.


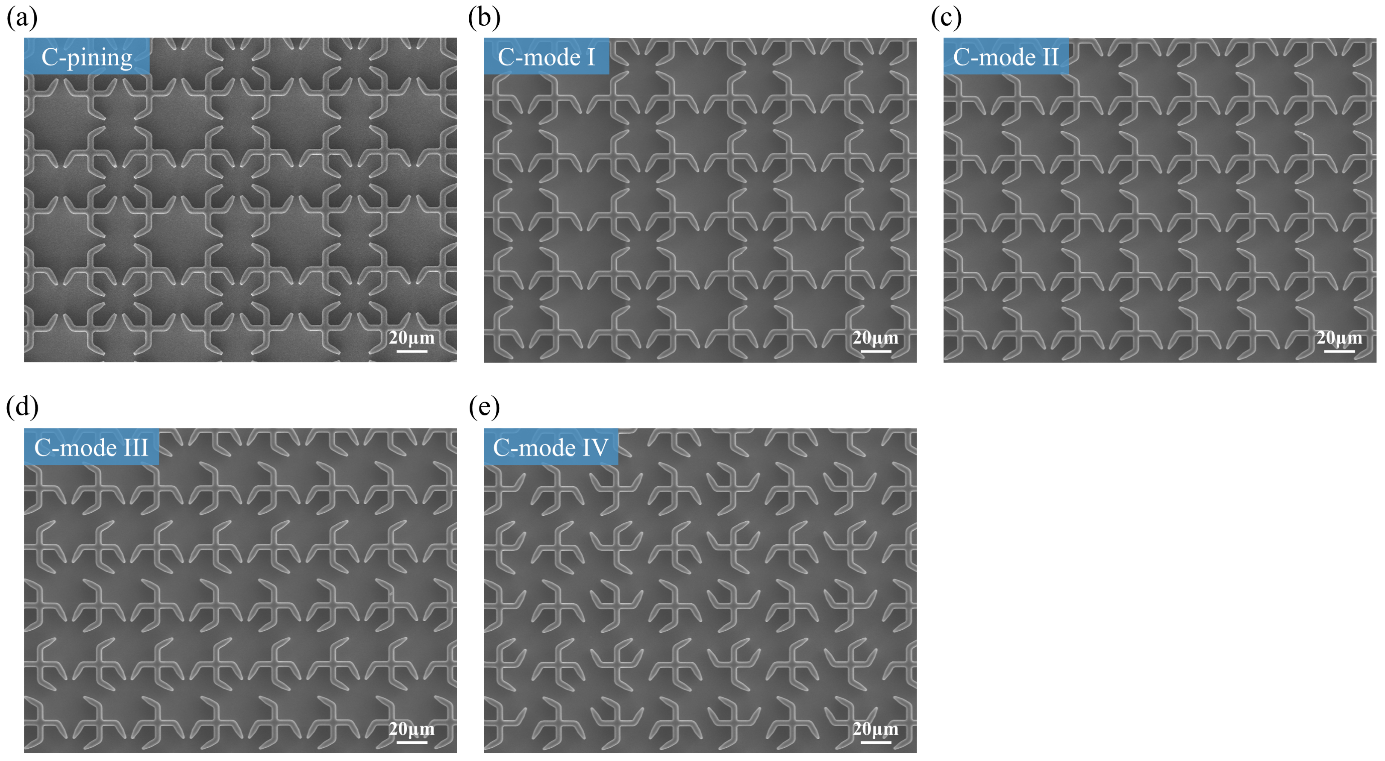


**Figure S1. SEM images of the cross-cusp microstructure exhibiting different fluid spreading modes.** (a) C-pinning mode, where the droplet remains pinned without noticeable spreading. (b) C-mode I, where the droplet body and precursor film spread unidirectionally along a predefined path. (c) C-mode II, enabling bidirectional spreading along two directions. (d) C-mode III, where the droplet body and precursor film expand in three directions. (e) C-mode IV, facilitating four-directional spreading.


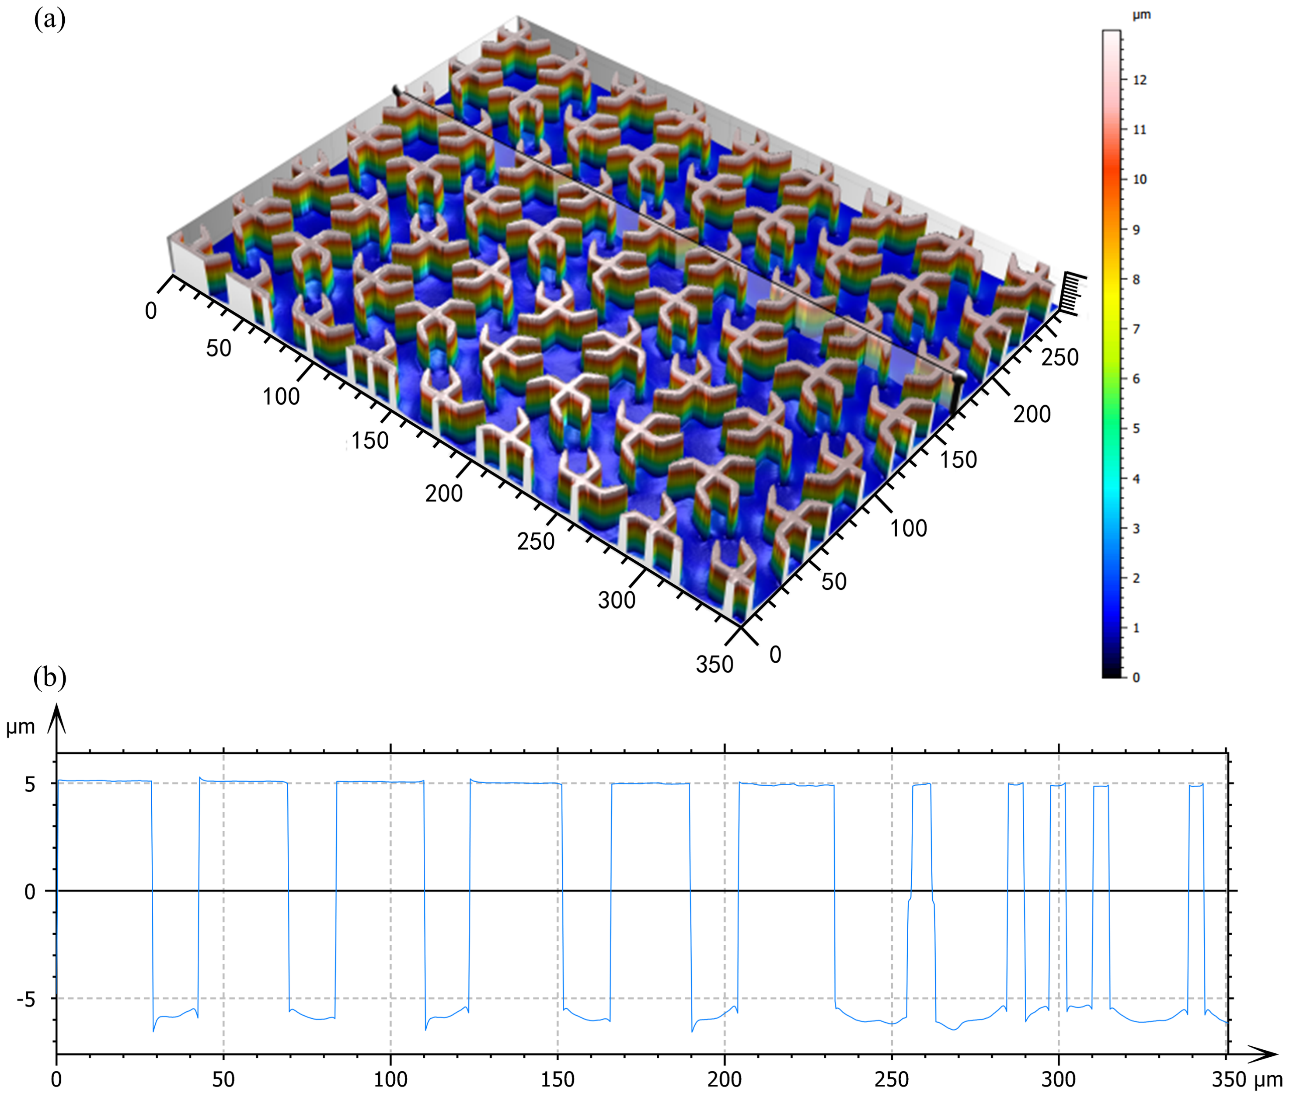


**Figure S2. Three-dimensional morphology and cross-sectional profile of the cross-cusp microstructure.** (a) 3D topographic reconstruction of the four-directional spreading microstructure (C-mode IV), showing the structural arrangement of the bulk and cusps. (b) Cross-sectional profile, revealing a uniform microstructure depth of approximately 10 μm and demonstrating the precision of the fabrication process.


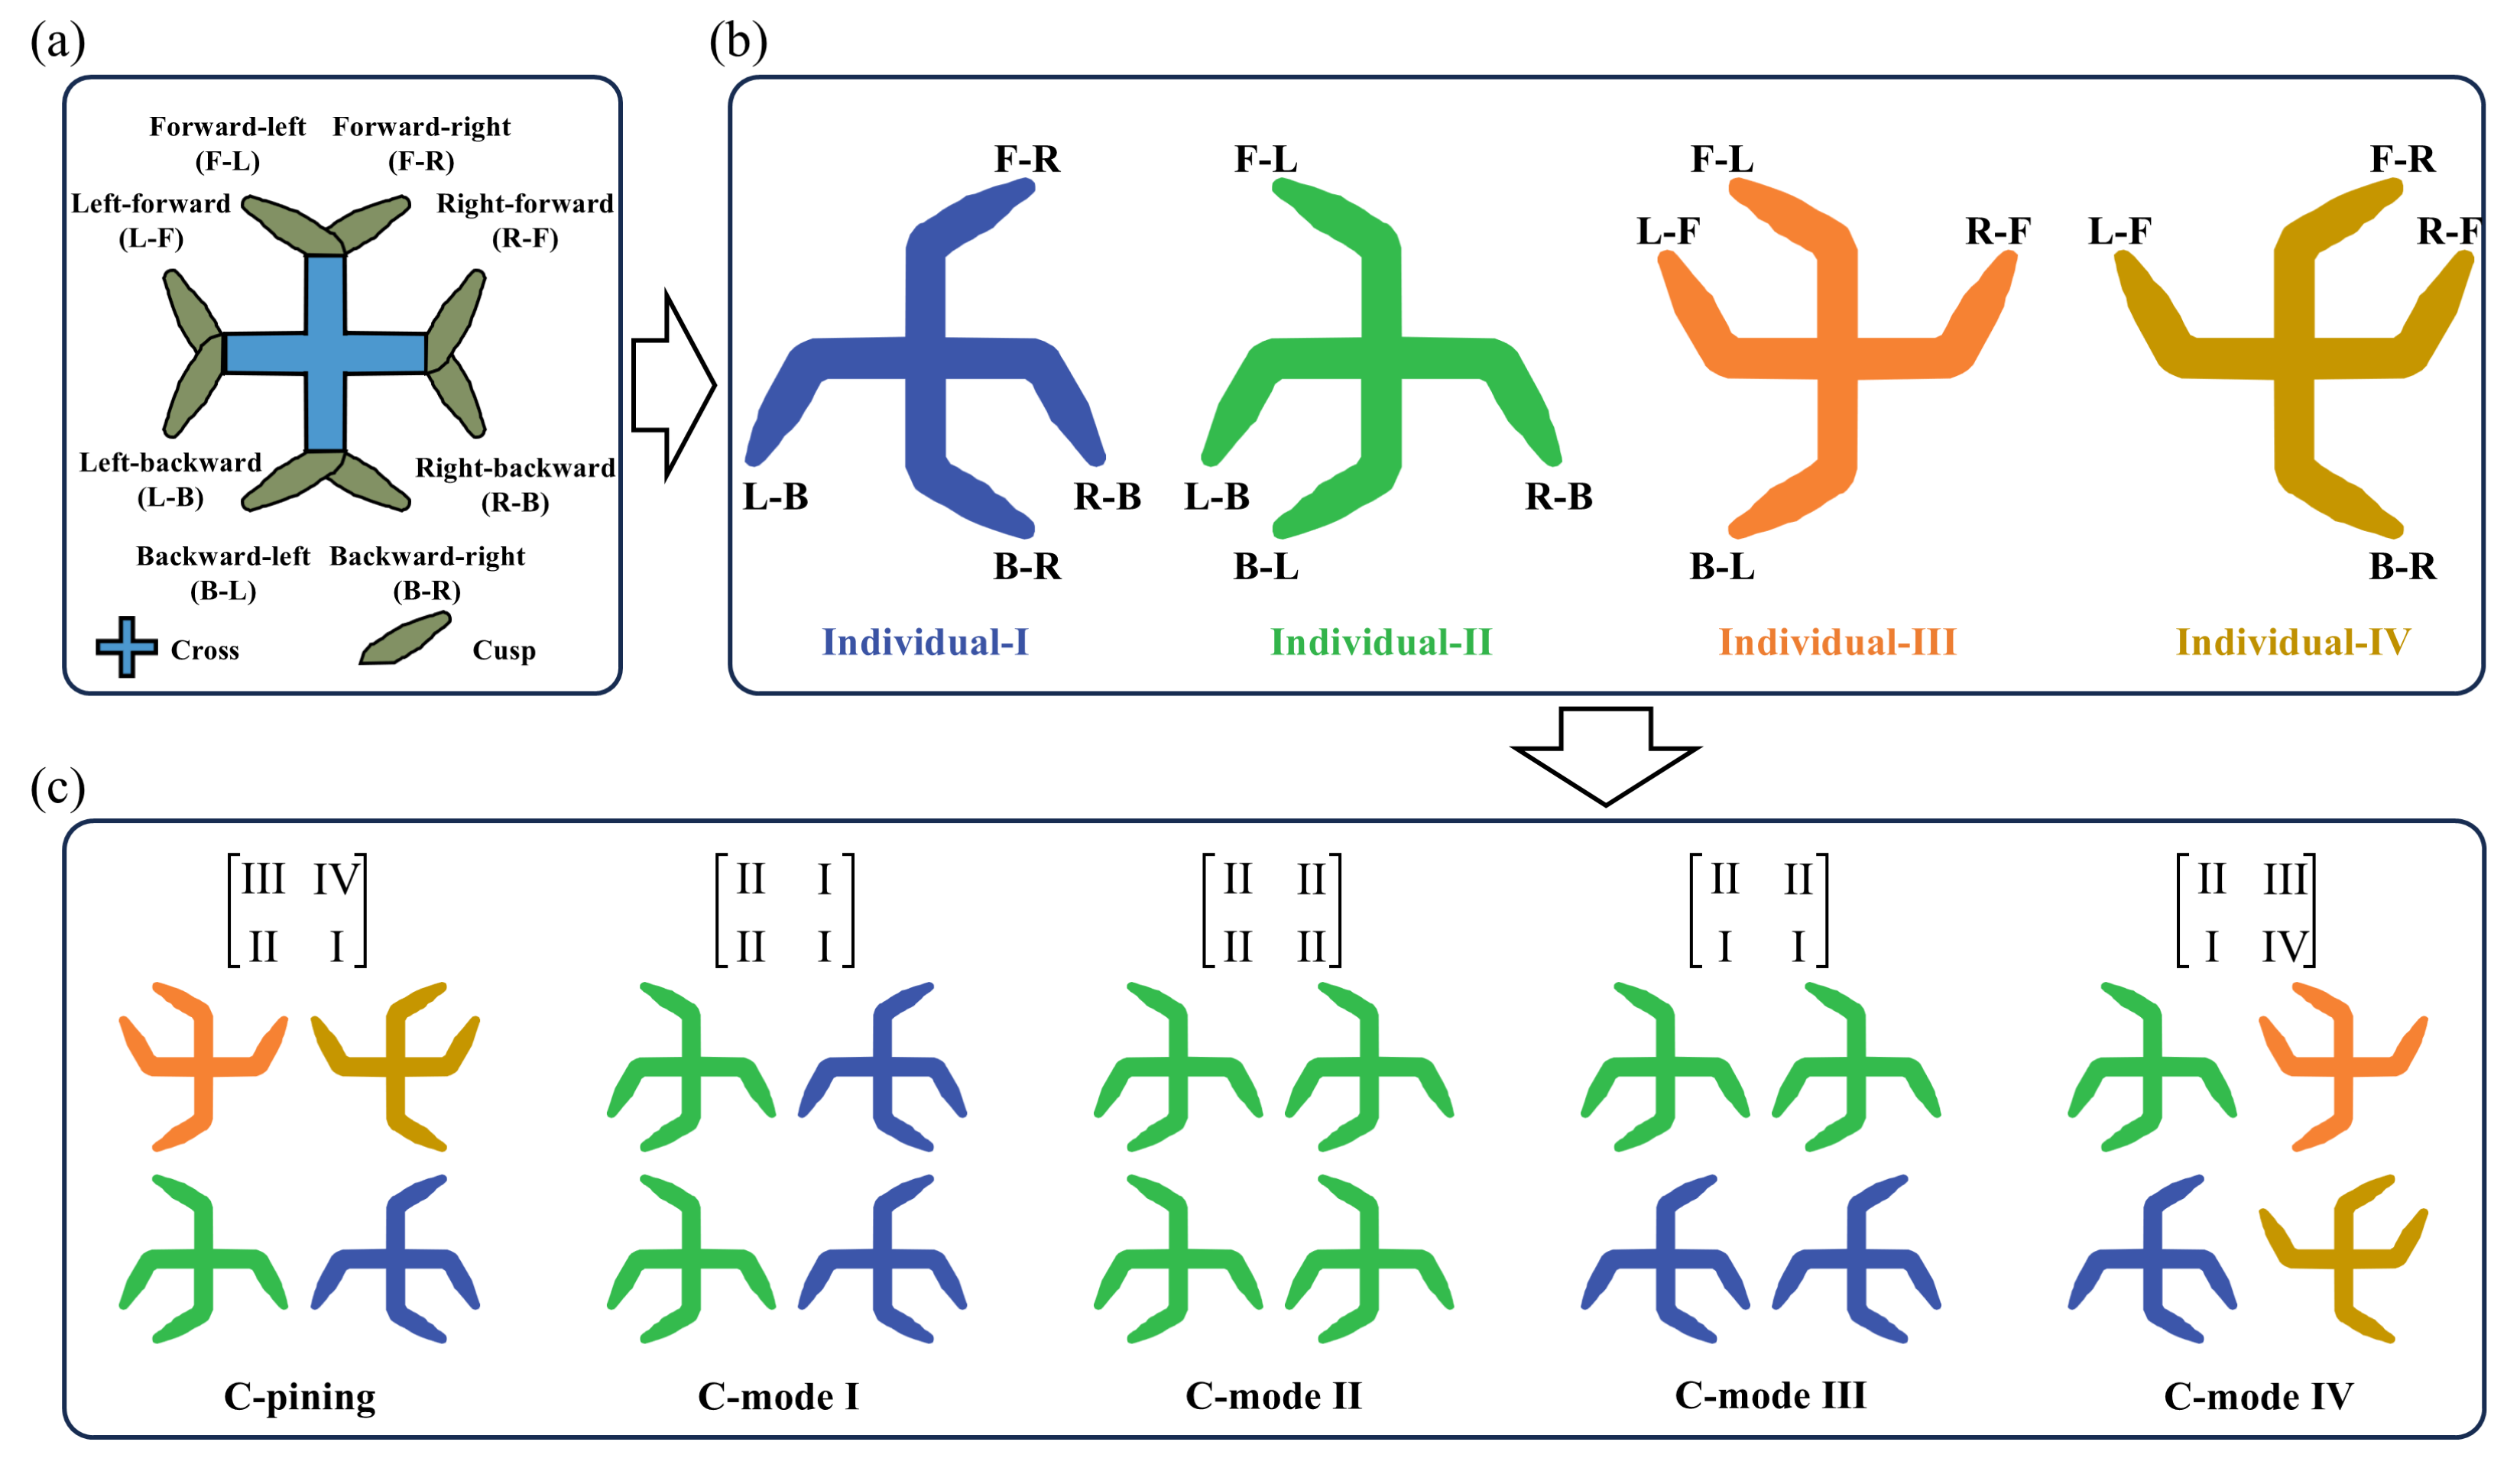


**Figure S3. Design of the cross-cusp microstructure and its fluid spreading patterns.** (a) Schematic illustration of the cross-cusp microstructure, showing the integration of a cross-shaped bulk with directionally arranged cusps. (b) Four distinct microstructure individuals constructed by varying the cusp orientations along the bulk edges. (c) Five array patterns formed by systematically arranging the individuals, enabling fluid pinning (C-pinning), unidirectional spreading (C-mode I), bidirectional spreading (C-mode II), three-directional spreading (C-mode III), and four-directional spreading (C-mode IV).


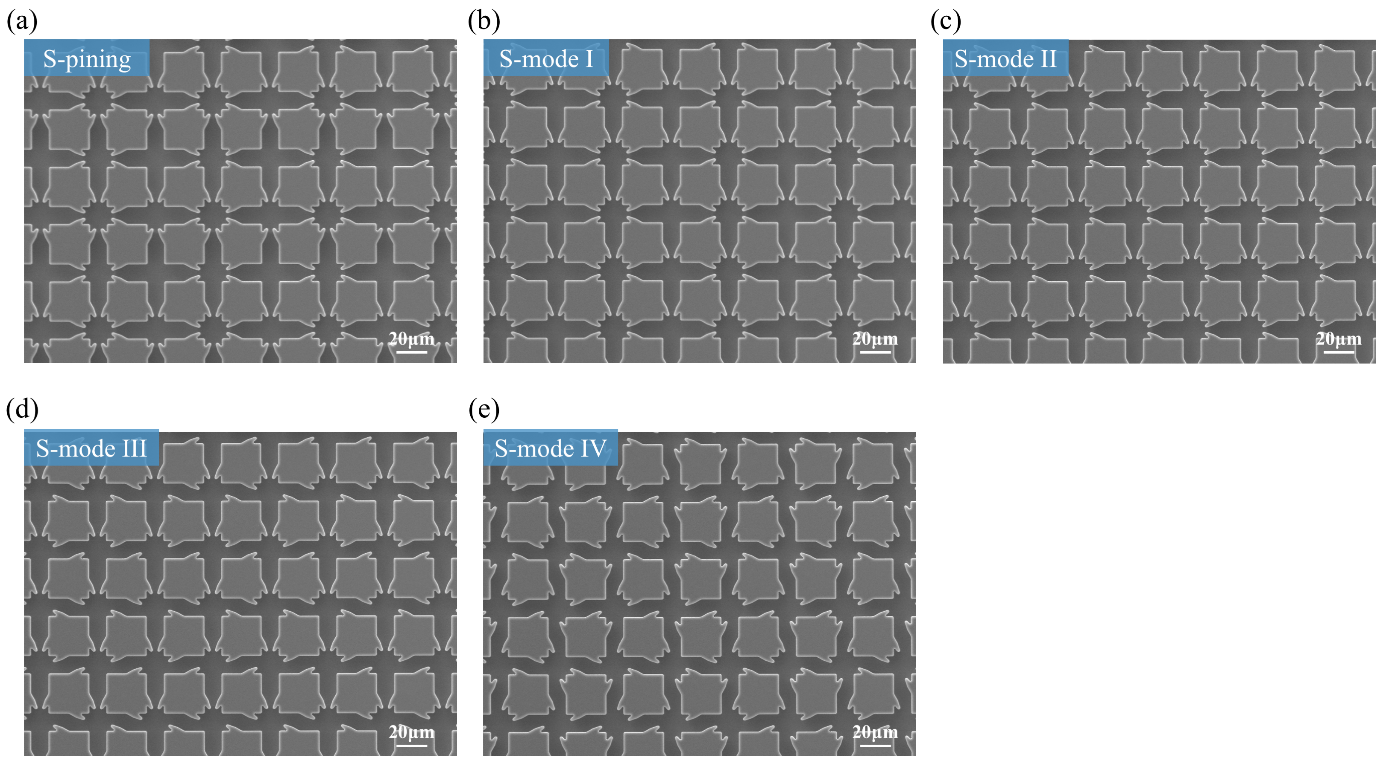


**Figure S4. SEM images of the square-cusp microstructures.** (a) S-pinning mode, where the precursor film remains confined. (b) S-mode I, where the precursor film spreads in a single direction. (c) S-mode II, enabling bidirectional spreading along two directions. (d) S-mode III, where the precursor film expands in three directions. (e) S-mode IV, achieving four-directional spreading.


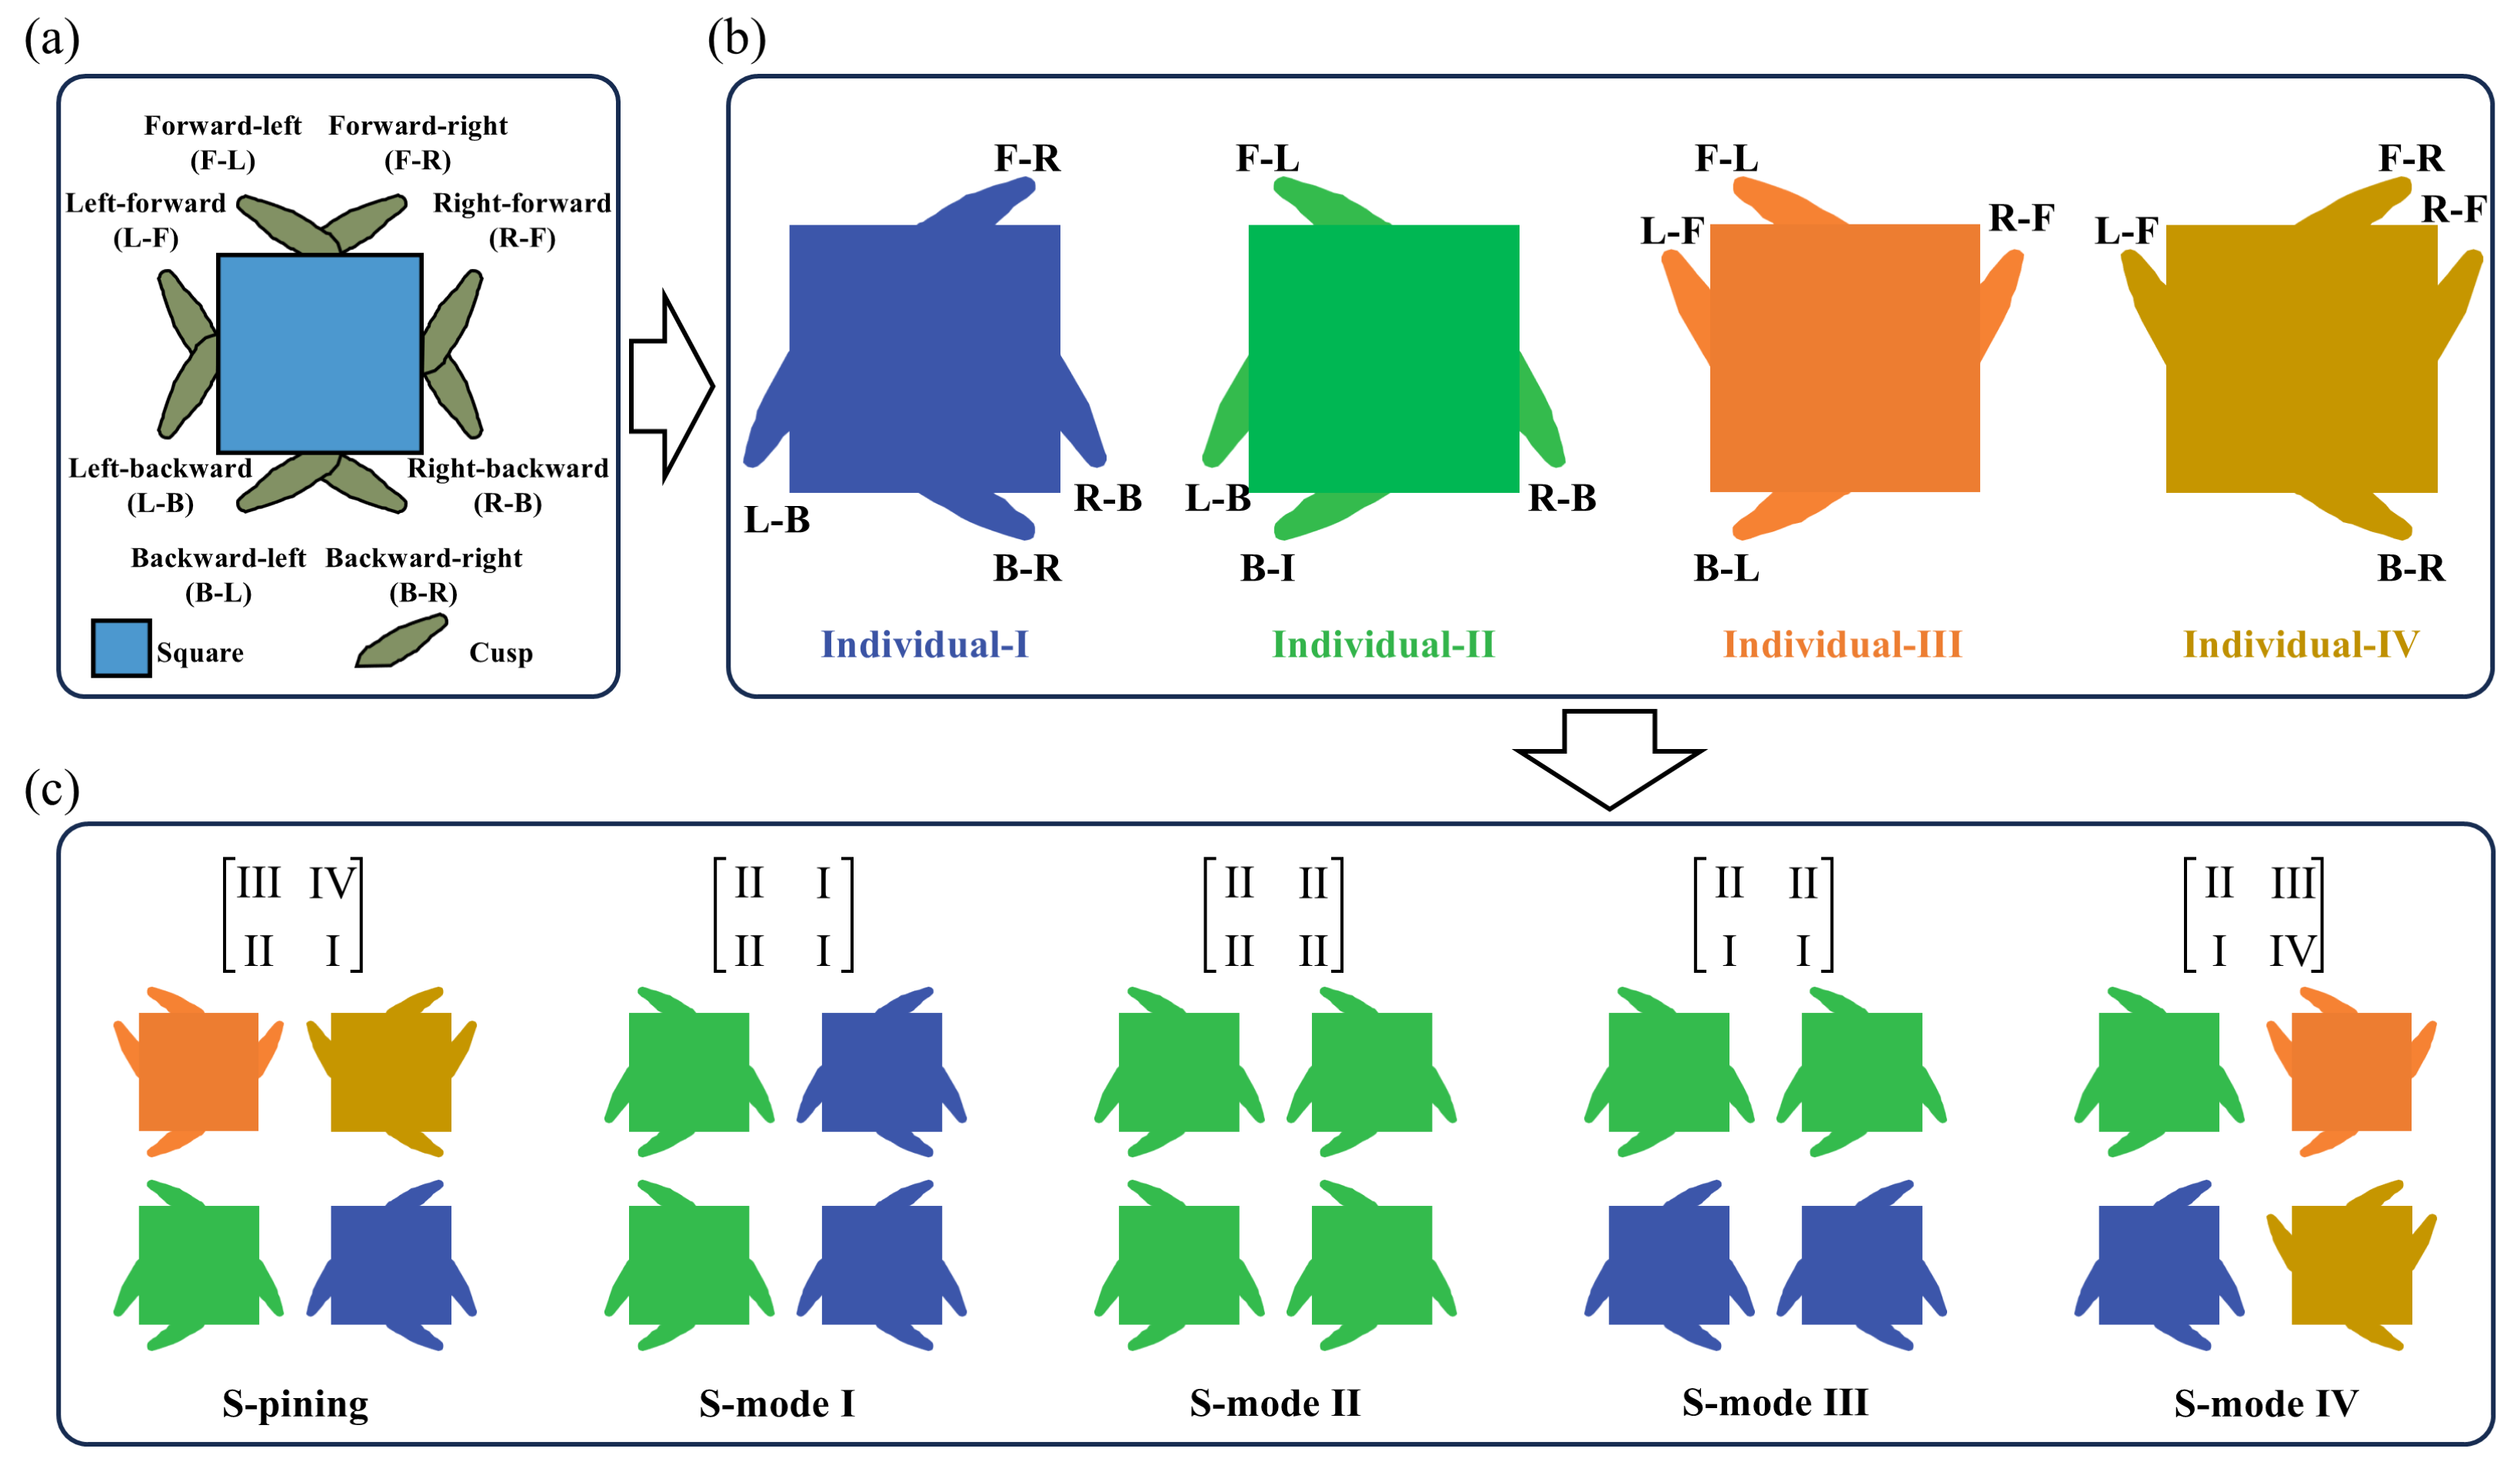


**Figure S5. Design of the square-cusp microstructure and its precursor film spreading patterns.** (a) Structural schematic of the square-cusp microstructure, featuring a square bulk with cusps arranged along its four edges. (b) Four distinct individual microstructure units (Individual I–IV) formed by varying cusp orientations, which determine the precursor film transport direction. (c) Five array patterns generated by systematically assembling the individual units, enabling precursor film pinning (S-pinning), as well as controlled unidirectional (S-mode I), bidirectional (S-mode II), three-directional (S-mode III), and four-directional (S-mode IV) spreading.


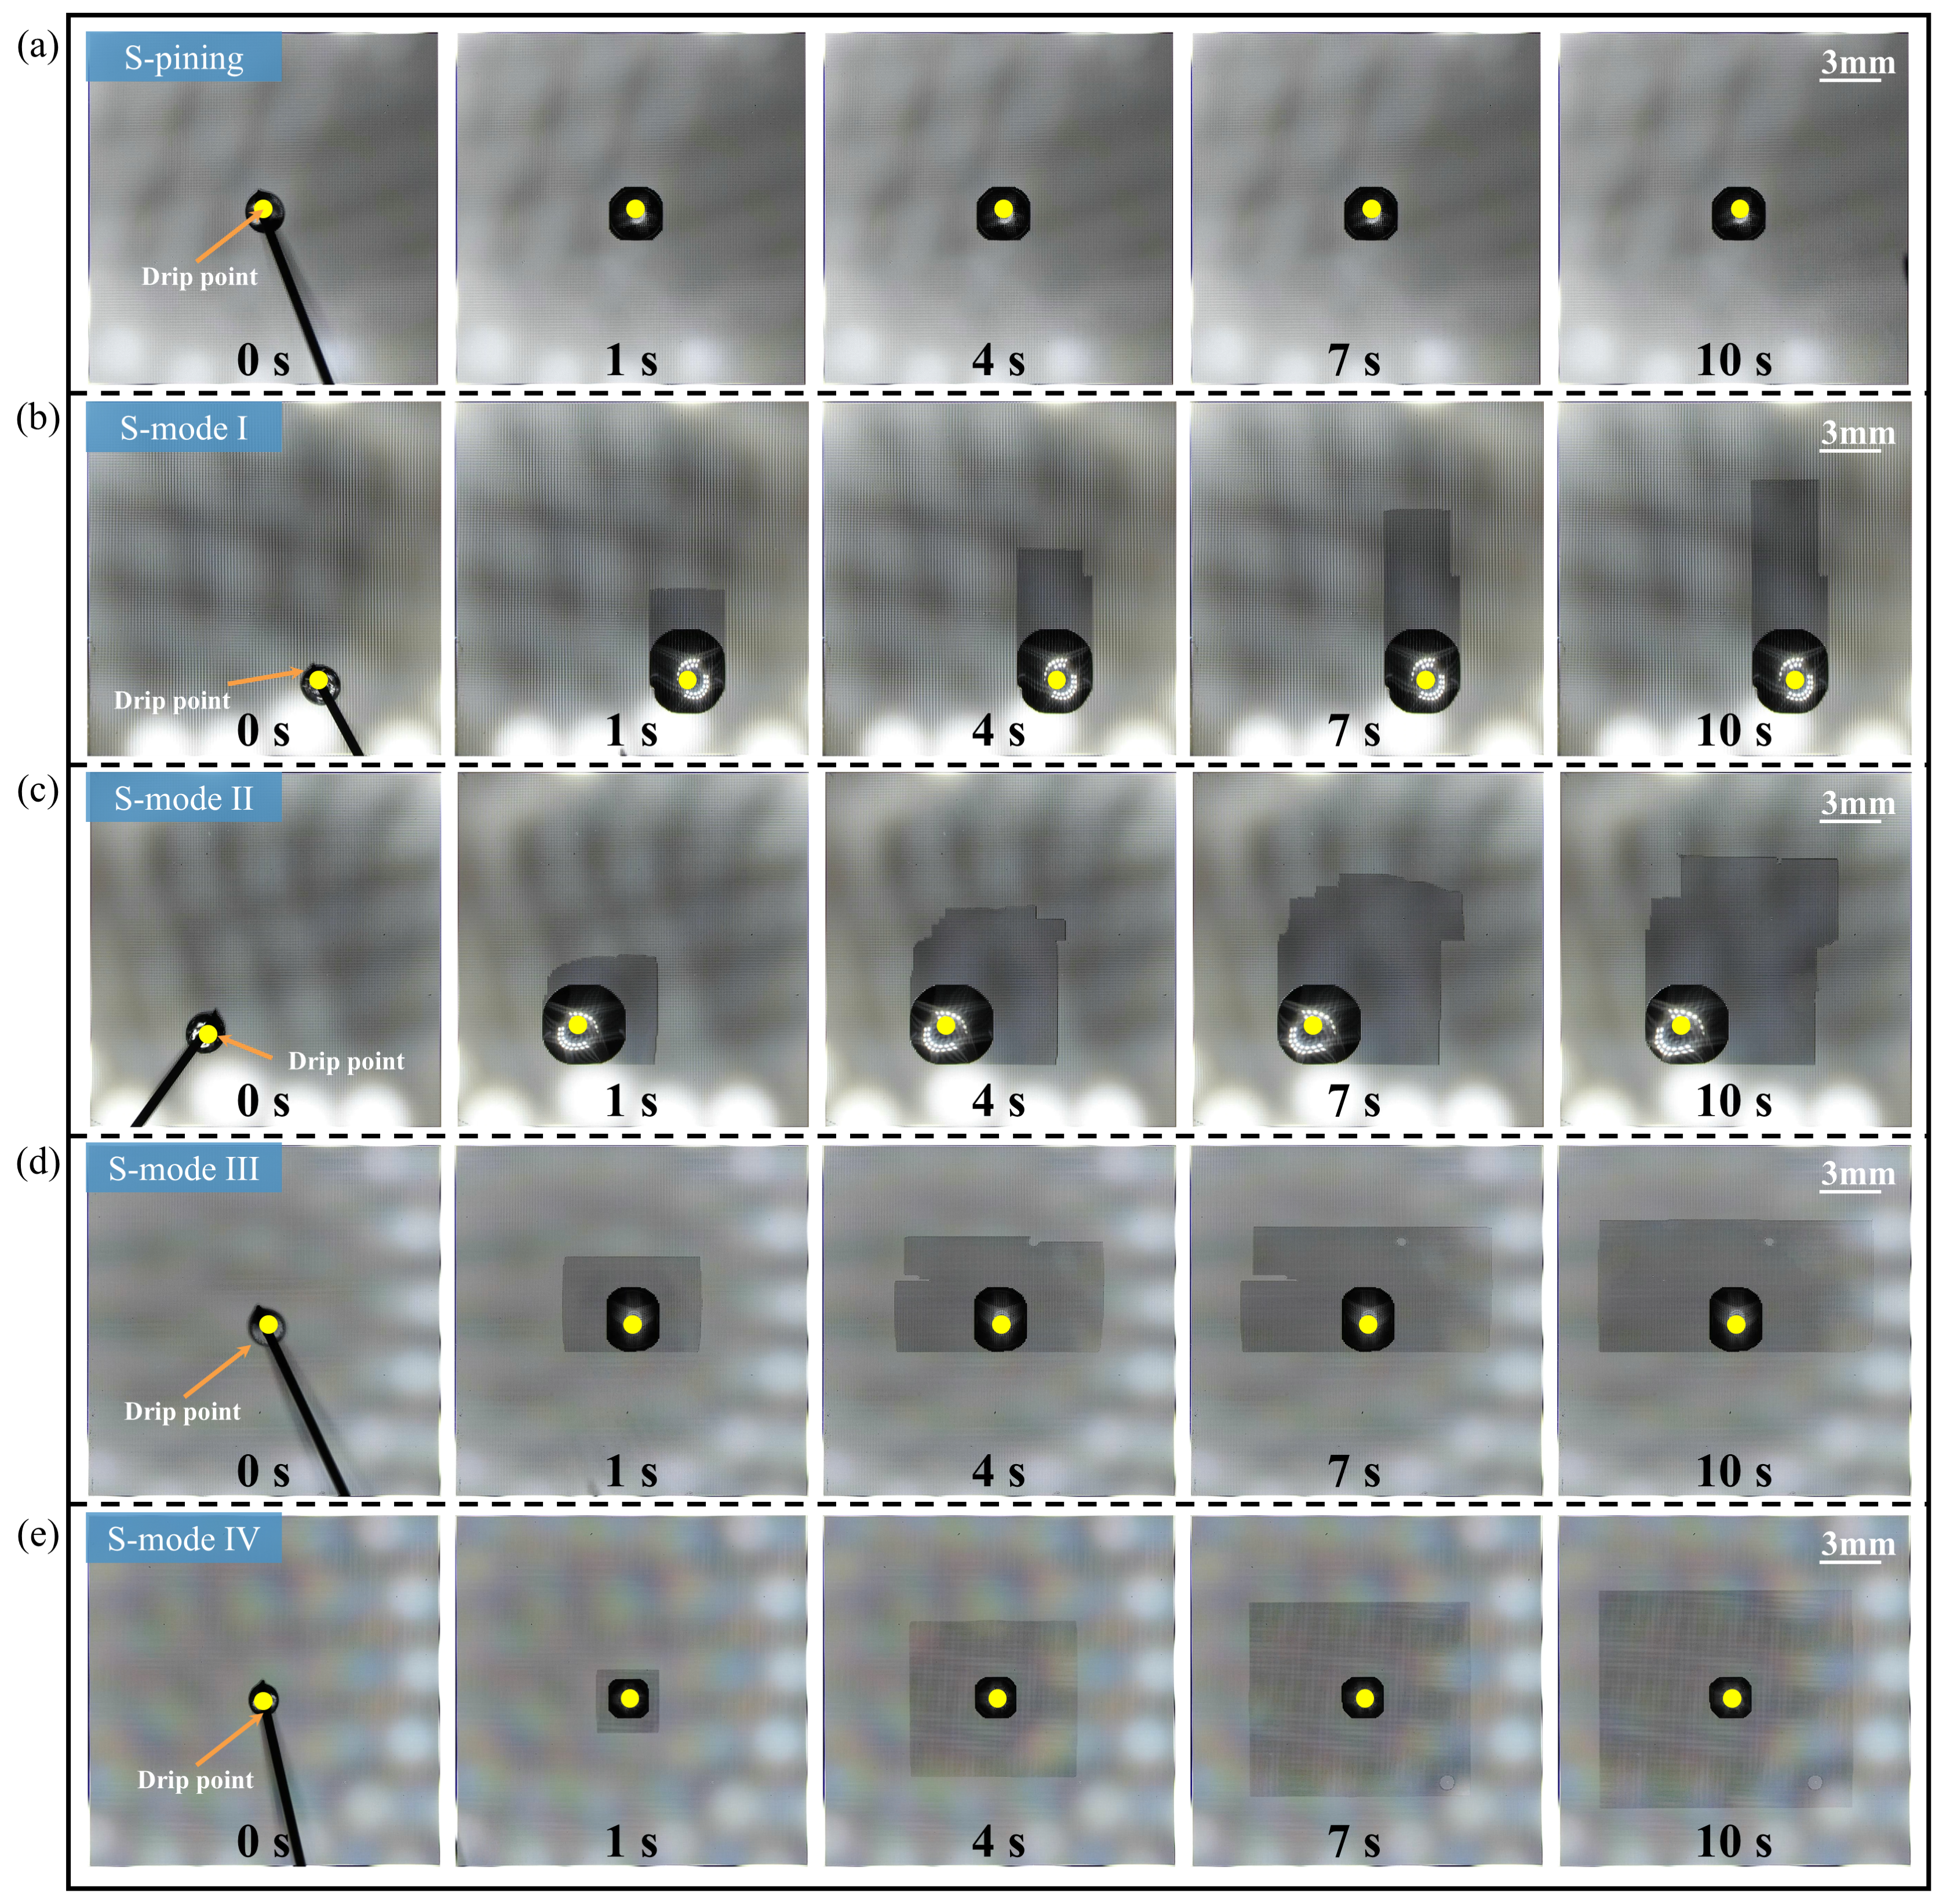


**Figure S6. Multi-directional fluid spreading behavior on the square-cusp microstructure.** (a-e) Optical images of precursor film multi-directional spreading where the film remains pinned in S-pinning mode and spreads along one to four directions in S-mode I–IV, with no significant spreading of the droplet body.


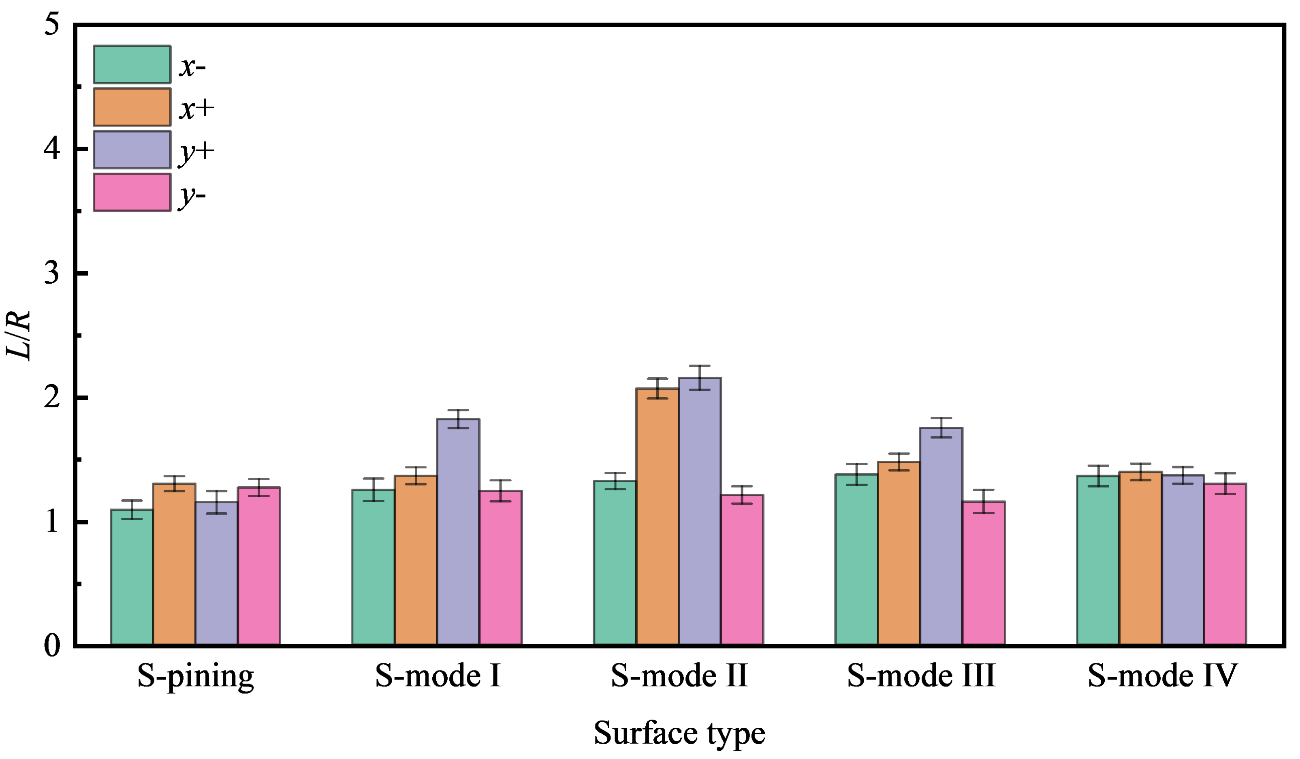


**Figure S7. Illustration of the spreading ratio *L*/*R* of the droplet body on square-cusp microstructure under different modes.** The square-cusp microstructure limits droplet body spreading, with *L*/*R* consistently lower than that of the cross-cusp microstructure, indicating reduced directional spreading ability.


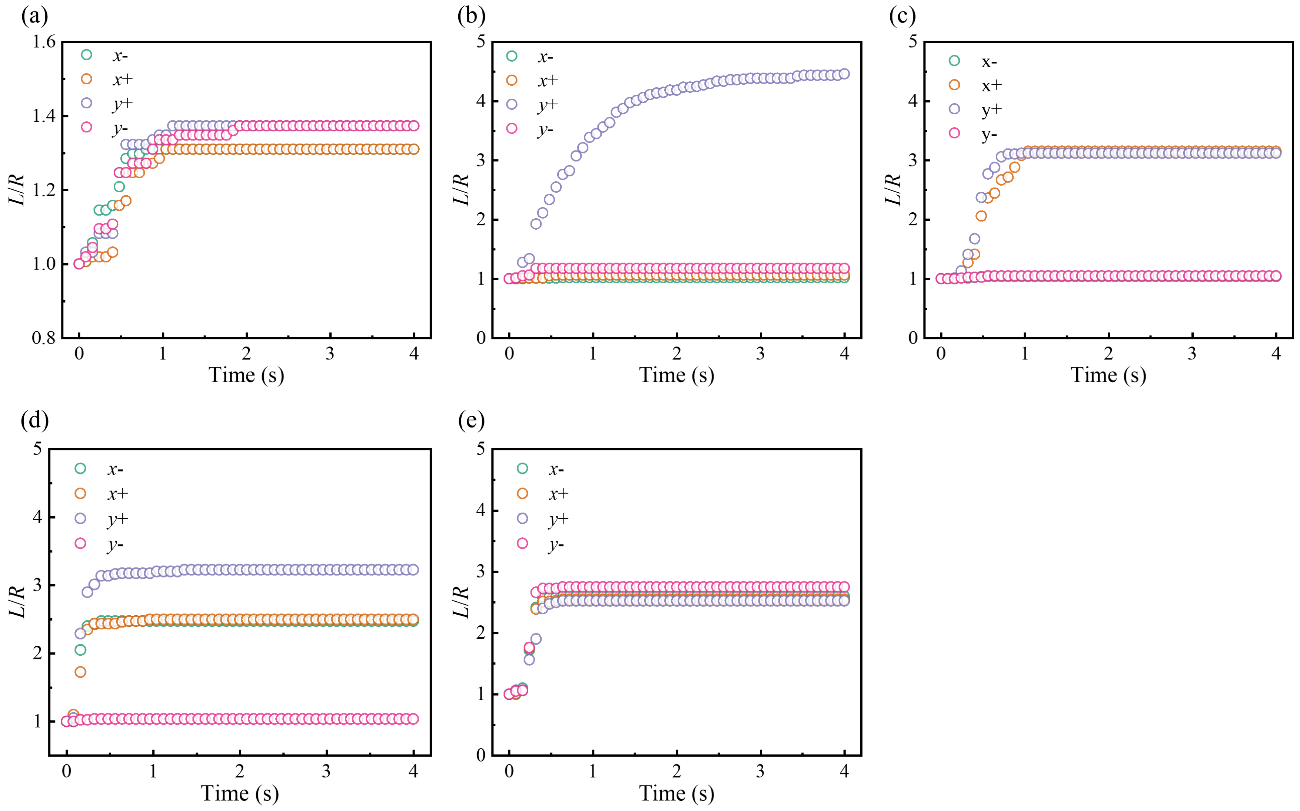


**Figure S8.** **Time-dependent spreading of the droplet body on cross-cusp microstructure.** (a-e) Plots of the spreading ratio *L*/*R* versus time for the droplet body under different modes, where the droplet remains pinned in C-pinning mode and spreads along one to four directions in C-mode I–IV.


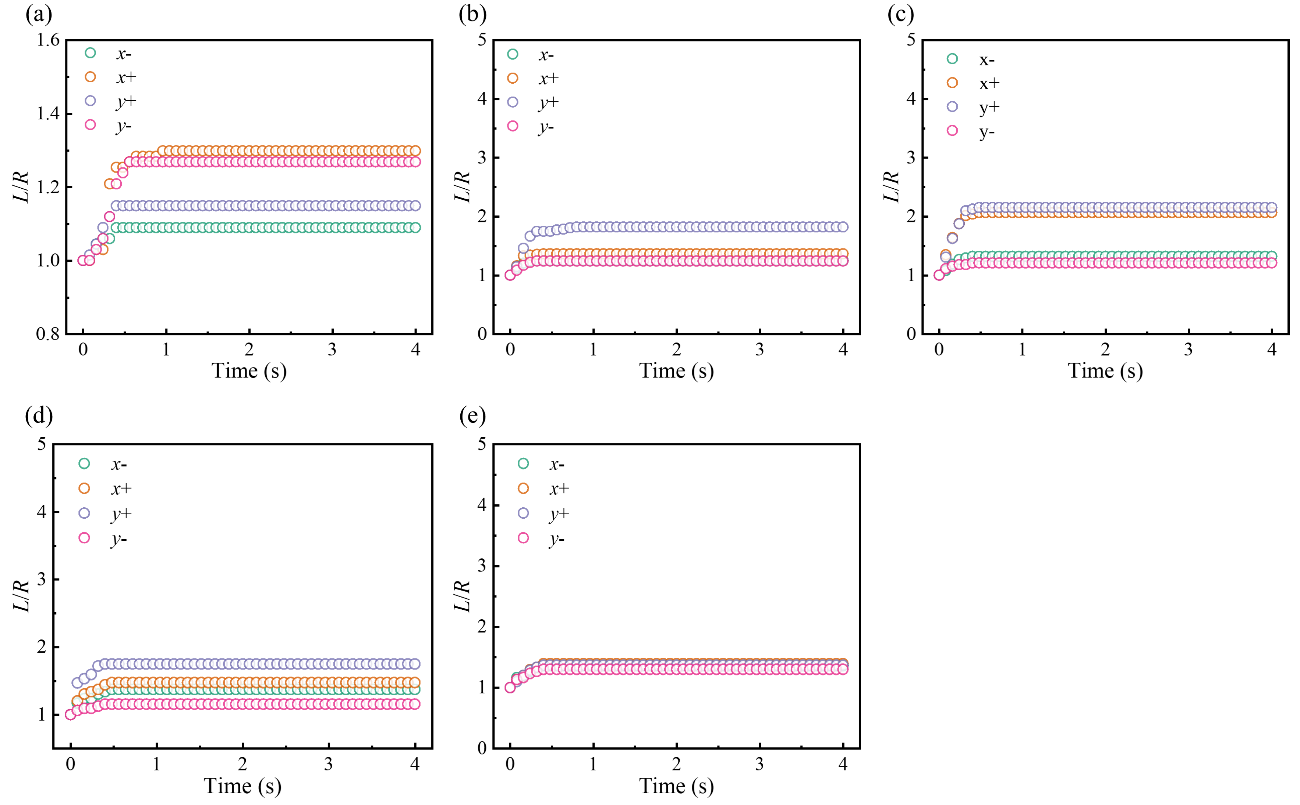


**Figure S9. Time-dependent spreading of the droplet body on square-cusp microstructure.** (a-e) Plots of the spreading ratio *L*/*R* versus time for the droplet body under different modes, showing that spreading remains limited across all modes. The droplet body remains pinned in S-pinning mode and exhibits slower spreading in S-mode I–IV compared to the cross-cusp microstructure.

**Mechanical Analysis of Multi-Directional Fluid Spreading and Pinning**

To address the complexity of force interactions during fluid spreading, the transient spreading state of the liquid interface was idealized for analysis. It is assumed that the contact angle between the precursor film and both the hydrophilic sidewalls and bottom surface is equal to the intrinsic contact angle of the liquid. The precursor film is considered to fully fill the bulk-cusp microstructure, with the contact line on the sidewalls forming a continuous inclined line. As illustrated in **Figure S10(a)**, the capillary attraction force from the sidewall , tangent to the fluid interface and pointing outward, is given by **Equation (S1)**:

(S1)

where *γ* is the surface tension between the liquid and the hydrophilic walls, *h* is the depth of the microstructure, and *θ* is the intrinsic contact angle. Similarly, the bottom surface generates a lateral capillary attraction, given by **Equation (S2)**:

(S2)

where *l* is the local width of the precursor film at the cusp (**Figure 3(c)**). These forces are decomposed in the *x*–*y* plane to yield components and (**Equation (S3)** - **(S4)**):

(S3)

(S4)

Further decomposition along the x-direction yields the capillary driving force and backward resistance generated by the sidewalls (**Equation (S5)** - **(S6)**):

(S5)

(S6)

where *α* and *β* are the angle between the cusp and bulk structure, and the apex angle of the cusp, respectively.

The capillary attraction from the bottom surface is given by **Equation (S7)**:

(S7)

The total forward capillary driving force and resistance are thus (**Equation (S8)** - **(S9)**):

(S8)

(S9)

Accordingly, the resultant force F acting on the precursor film in the forward direction is given by **Equation (S10)**:

(S10)

For precursor film forward spreading, must be satisfied. When , corresponding to hydrophobic or superhydrophobic surfaces, , and spreading is inhibited. When , the necessary condition for spreading holds (**Inequation (S11)**):

(S11)

**Equation (S10)** shows that *F* is positively correlated with *l*. Given that the minimal width between cusps is *W*=3 μm and *h*=10 μm, the directional spreading condition simplifies to **(Inequation (S12)**):

(S12)

Accordingly, the relationship between *θ* and *α*−*β* defines the feasible design space for forward spreading, as illustrated by the shaded region in **Figure 3(g)**. The relation demonstrates a negative correlation between force magnitudes and both *θ* and *α*−*β*, implying that smaller values of *θ* and *α*−*β* enhance spontaneous fluid spreading. Points closer to the origin represent greater driving forces. The red dot in **Figure 3(g)** marks the parameter set used in this study, confirming the suitability of the selected geometry for guided precursor film spreading.

In addition to promoting forward spreading, the sharp edges of the cusp structure provide effective pinning in the reverse direction due to the sharp edge effect, as shown in **Figure 3(d)** and **(e)**. When a droplet contacts a sharp edge with an inclination angle *φ* smaller than the intrinsic contact angle *θ*, the real contact angle becomes larger than the nominal one, inhibiting spreading or collapse. The critical contact angle *θ*c at the cusp edge can be approximated by (**Equation (S13)**):

(S13)

Thus, sharp cusp edges hinder reverse spreading of the droplet body. As illustrated in **Figure 3(f)**, the sidewall pinning resistance is analyzed by modeling the pinned interface as a cylindrical surface. Assuming capillary force is dominant, the resistance force for is given by **Equation (S14)**:

(S14)

When , the pinning resistance reaches its maximum **Equation (S15)**:

(S15)

When , the pinning resistance from the microstructure sidewalls acting on the precursor film is given by **Equation (S16)**:

(S16)

This inequality, , thus defines the necessary condition for effective pinning of the precursor film by the cusp structure. As illustrated in **Figure S10(b)**, the shaded region delineates the combinations of *θ* and *α* satisfying this condition. For the intrinsic contact angle *θ*=35°, the upper bound of *α* for successful pinning is *α*<125°. The red dot marks the design configuration used in this study, positioned near the line *α*=*θ*, indicating strong pinning capability in the backward direction.


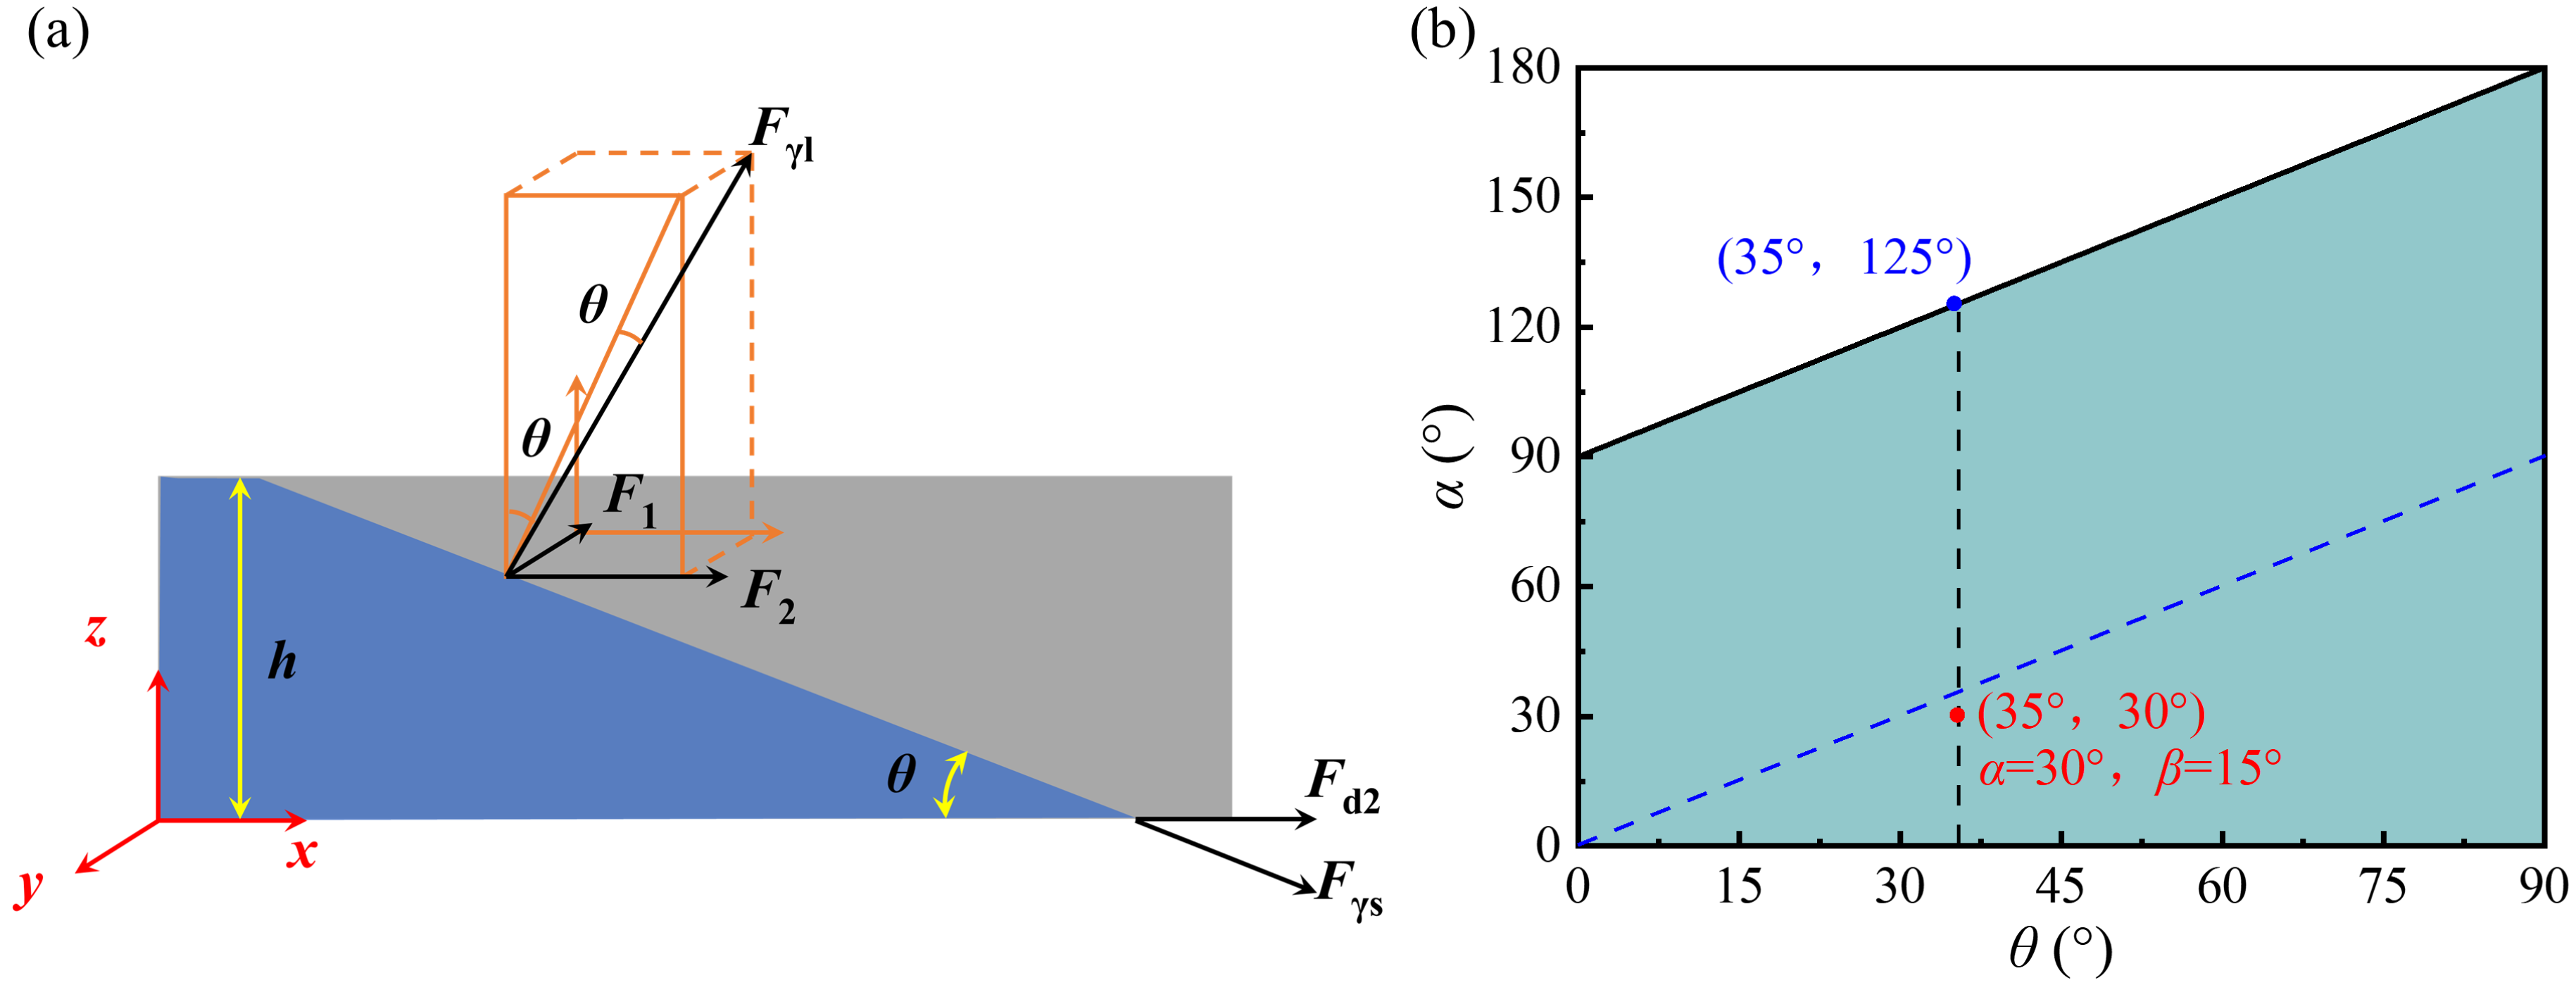


**Figure S10.** **Force analysis related to precursor film spreading and backward pinning.** (a) Schematic of capillary force decomposition during precursor film spreading on the bulk-cusp microstructure. (b) Design space for backward pinning defined by the intrinsic contact angle *θ* and cusp-to-bulk angle *α*, where the shaded region satisfies the condition *α*−*θ*<90°for effective precursor film pinning.


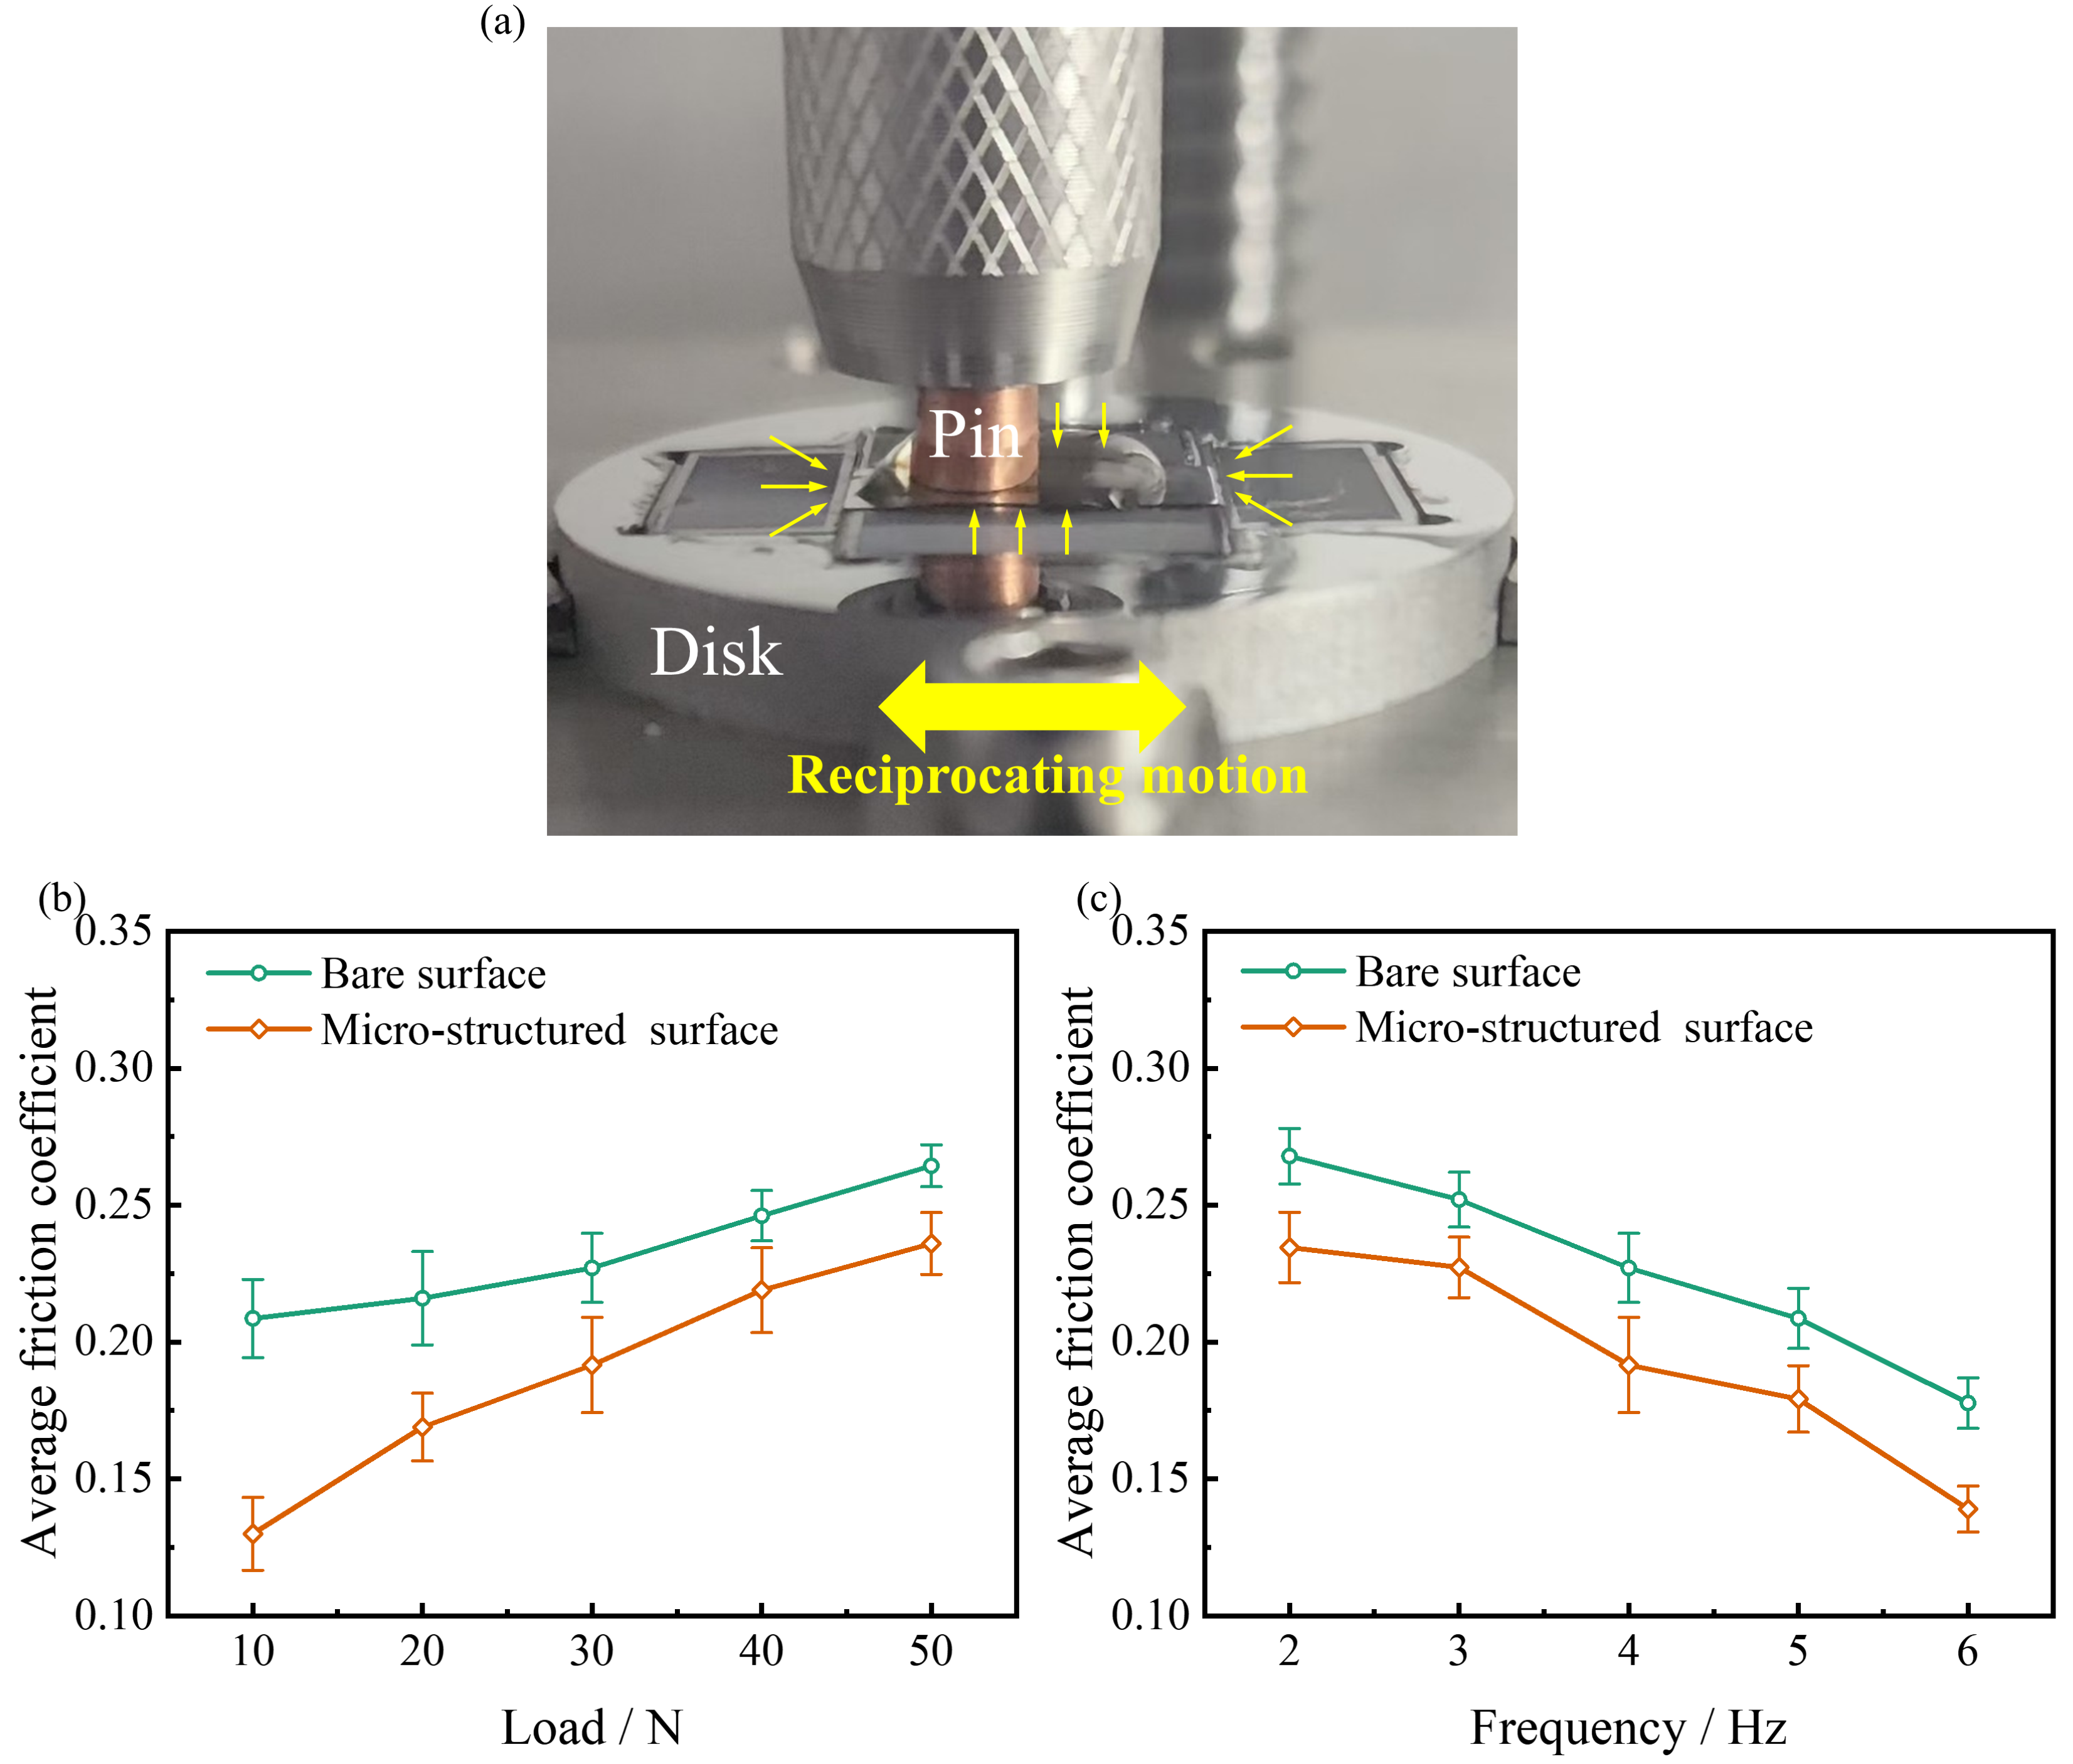


**Figure S11. Tribological performance evaluation of micro-structured and bare surfaces under variable conditions.** (a) Schematic of the pin-on-disk tribological test under water lubrication. (b) Average friction coefficients of micro-structured and bare surfaces measured at different normal loads (10~50 N) under a fixed frequency of 4 Hz. (c) Average friction coefficients under different sliding frequencies (2~6 Hz) at a fixed load of 30 N. In both cases, the cross-cusp micro-structured surface exhibits consistently lower friction, confirming enhanced lubrication across varying mechanical conditions.


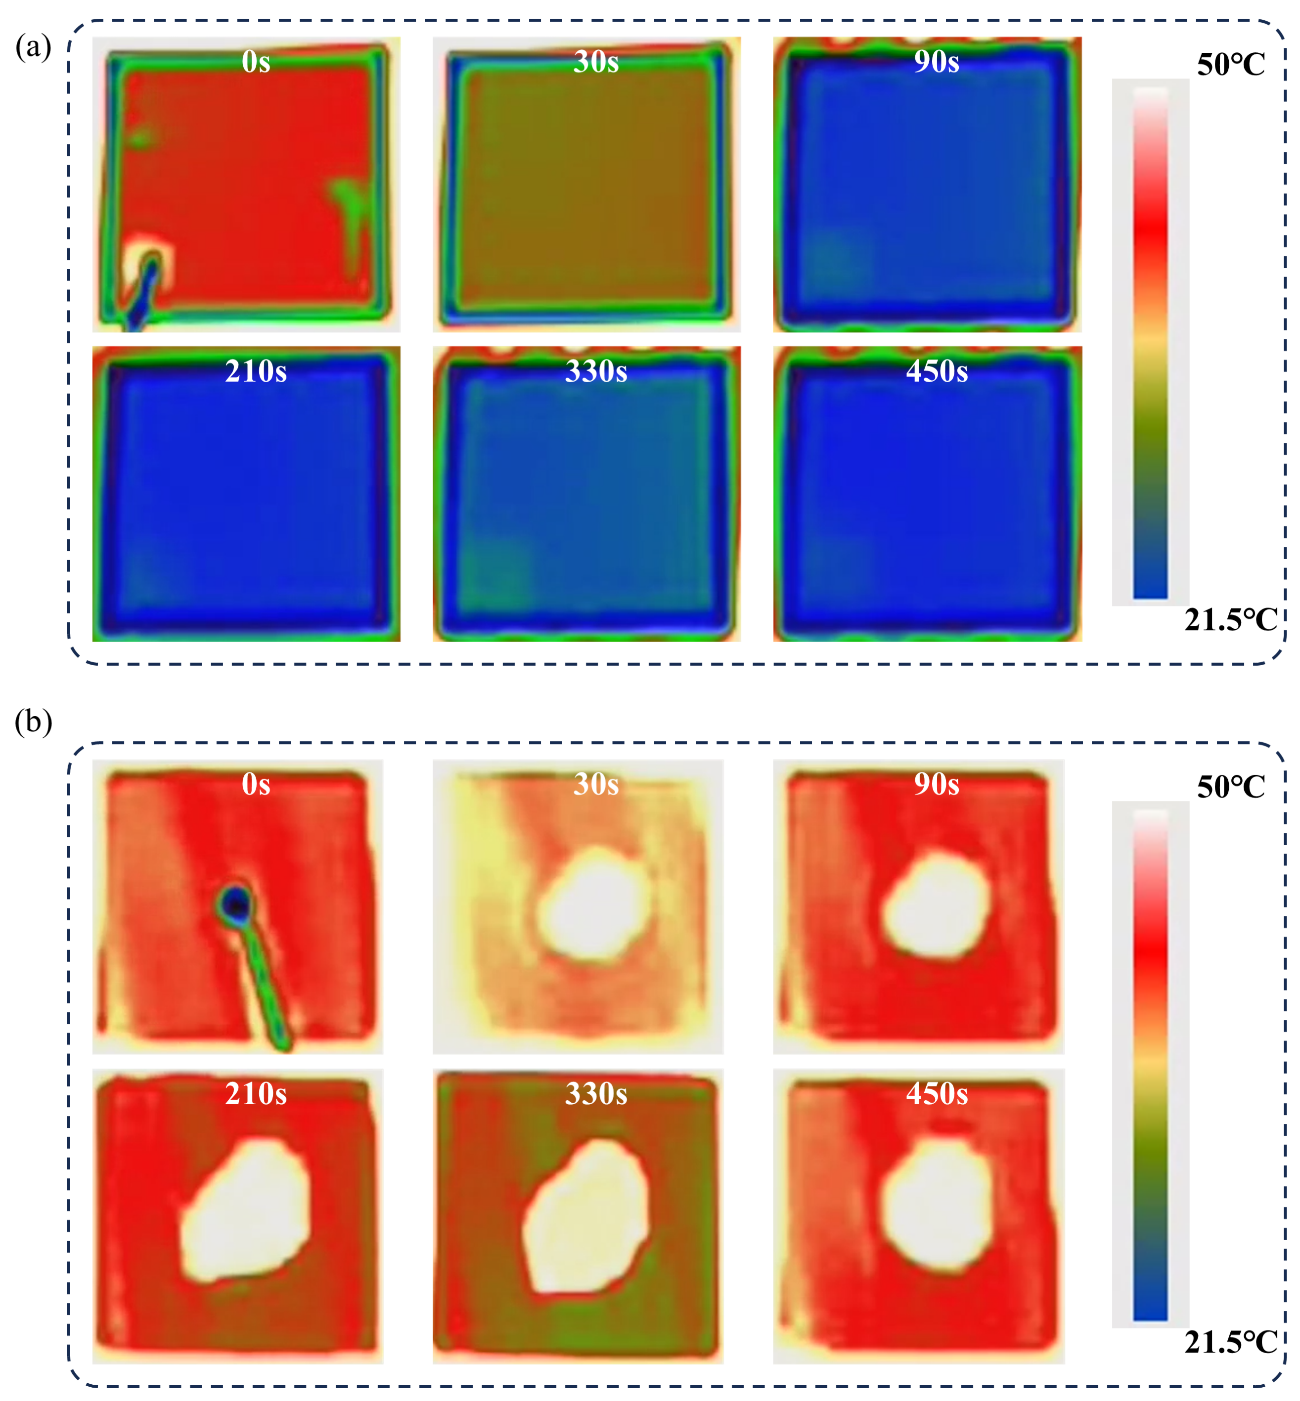


**Figure S12. Infrared thermal images for evaluating long-term cooling performance under periodic addition of 5 μL deionized water about every 30 s.** (a) Square-cusp micro-structured surface (S-mode II) displays rapid temperature reduction and spatially uniform cooling across the wetted region. (b) Bare surface exhibits delayed cooling response with non-uniform temperature distribution and evident localized heat accumulation.

**Movie S1. Spreading behaviors of a droplet on the cross-cusp micro-structured surface under five array configurations** **(C-pinning and C-mode I–IV).** The droplet body and precursor film exhibit distinct directional spreading or pinning depending on the cusp arrangement.

**Movie S2. Spreading behaviors of a droplet on the square-cusp micro-structured surface under five array configurations (S-pinning and S-mode I–IV).** The precursor film spreads directionally while the droplet body remains pinned across all configurations.

**Movie S3. High-speed snaps of fluid spreading on a C-mode II micro-structured surface.** The precursor film initiates from the narrow gap between adjacent cusps and guides the directional spreading of the droplet body via asymmetric capillary forces.

**Movie S4. Time-dependent visualization of precursor film transport on the square-cusp micro-structured surface across S-mode I and S-mode II regions.** The precursor film follows preset routes and undergoes turning at region boundaries, forming continuous wetting pathways.

**Movie S5. Infrared thermal imaging of the square-cusp micro-structured surface (S-mode II) and the bare surface after addition of a single 5 μL deionized water droplet.** The microstructured surface shows rapid and uniform cooling, whereas cooling on the bare surface is limited and localized.

**Movie S6. Infrared thermal imaging of the square-cusp micro-structured surface (S-mode II) and the bare surface under repeated 5 μL water addition every 30 s.** The microstructured surface maintains stable long-lasting cooling over time, in contrast to fluctuating thermal behavior and heat accumulation on the bare surface.
